# Supplementary material for: Biological and Spectroscopic Investigations of New Tenoxicam and 1.10-Phenthroline Metal Complexes
Source: PubMed Central journal article supplement (PMC7179110; doi:10.3390/molecules25051027), 2020-02-25
Supplement: molecules-25-01027-s001.pdf [file molecules-25-01027-s001.pdf]

## Supplementary Materials

# Biological and spectroscopic investigations of new tenoxicam and 1.10-phenthroline metal complexes

Hazem S. Elshafie <sup>1</sup>, Sadeek A Sadeek <sup>2</sup>, Ippolito Camele <sup>1,\*</sup>, Amira A. Mohamed <sup>3</sup>

<sup>1</sup> School of Agricultural, Forestry, Food and Environmental Sciences, University of Basilicata, Viale dell'Ateneo Lucano 10, 85100 Potenza, Italy; hazem.elshafie@unibas.it (H.S.E.); ippolito.camele@unibas.it (I.C.);

<sup>2</sup> Department of Chemistry, Faculty of Science, Zagazig University, 44519 Zagazig, Egypt; s\_sadeek@zu.edu.eg (S.A.S.);

<sup>3</sup> Department of Basic Science, Zagazig Higher Institute of Engineering and Technology, Zagazig, Egypt; amiraabdeldayem6@gmail.com (A.A.M.).

\* Correspondence: ippolito.camele@unibas.it; Tel.: +39 0971 205544; Fax: +39 0971 205503

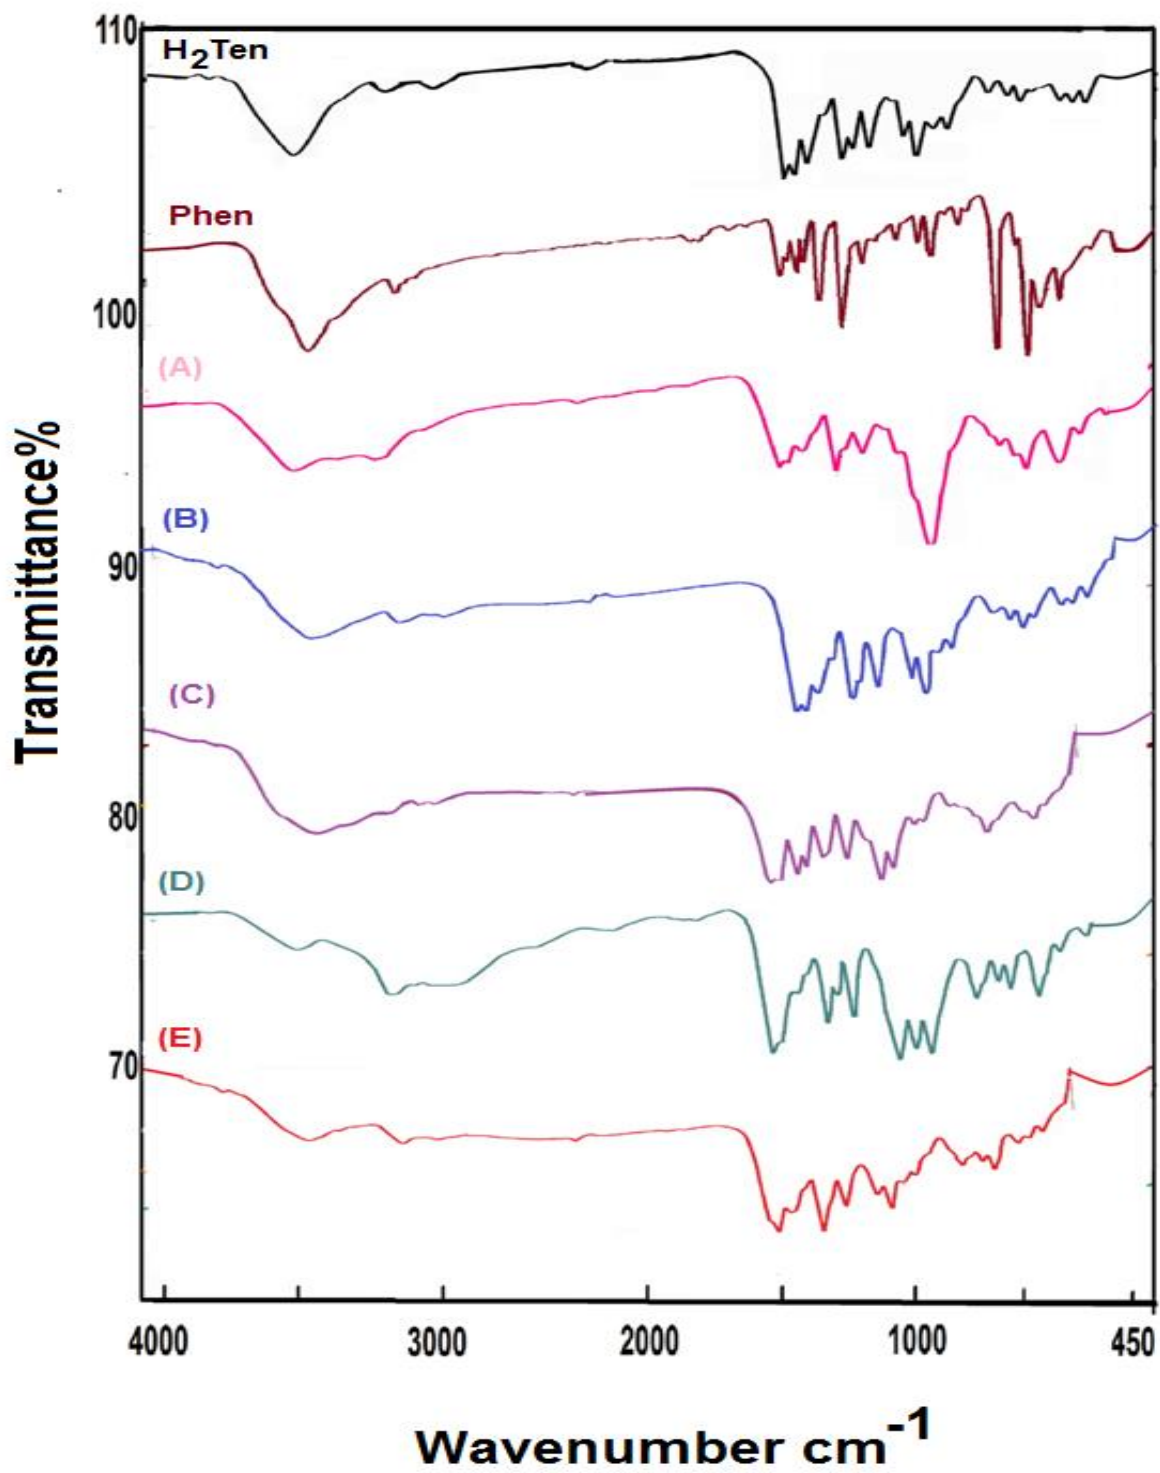

**Fig. S1:** Infrared spectra for H<sub>2</sub>Ten, Phen and their complexes.

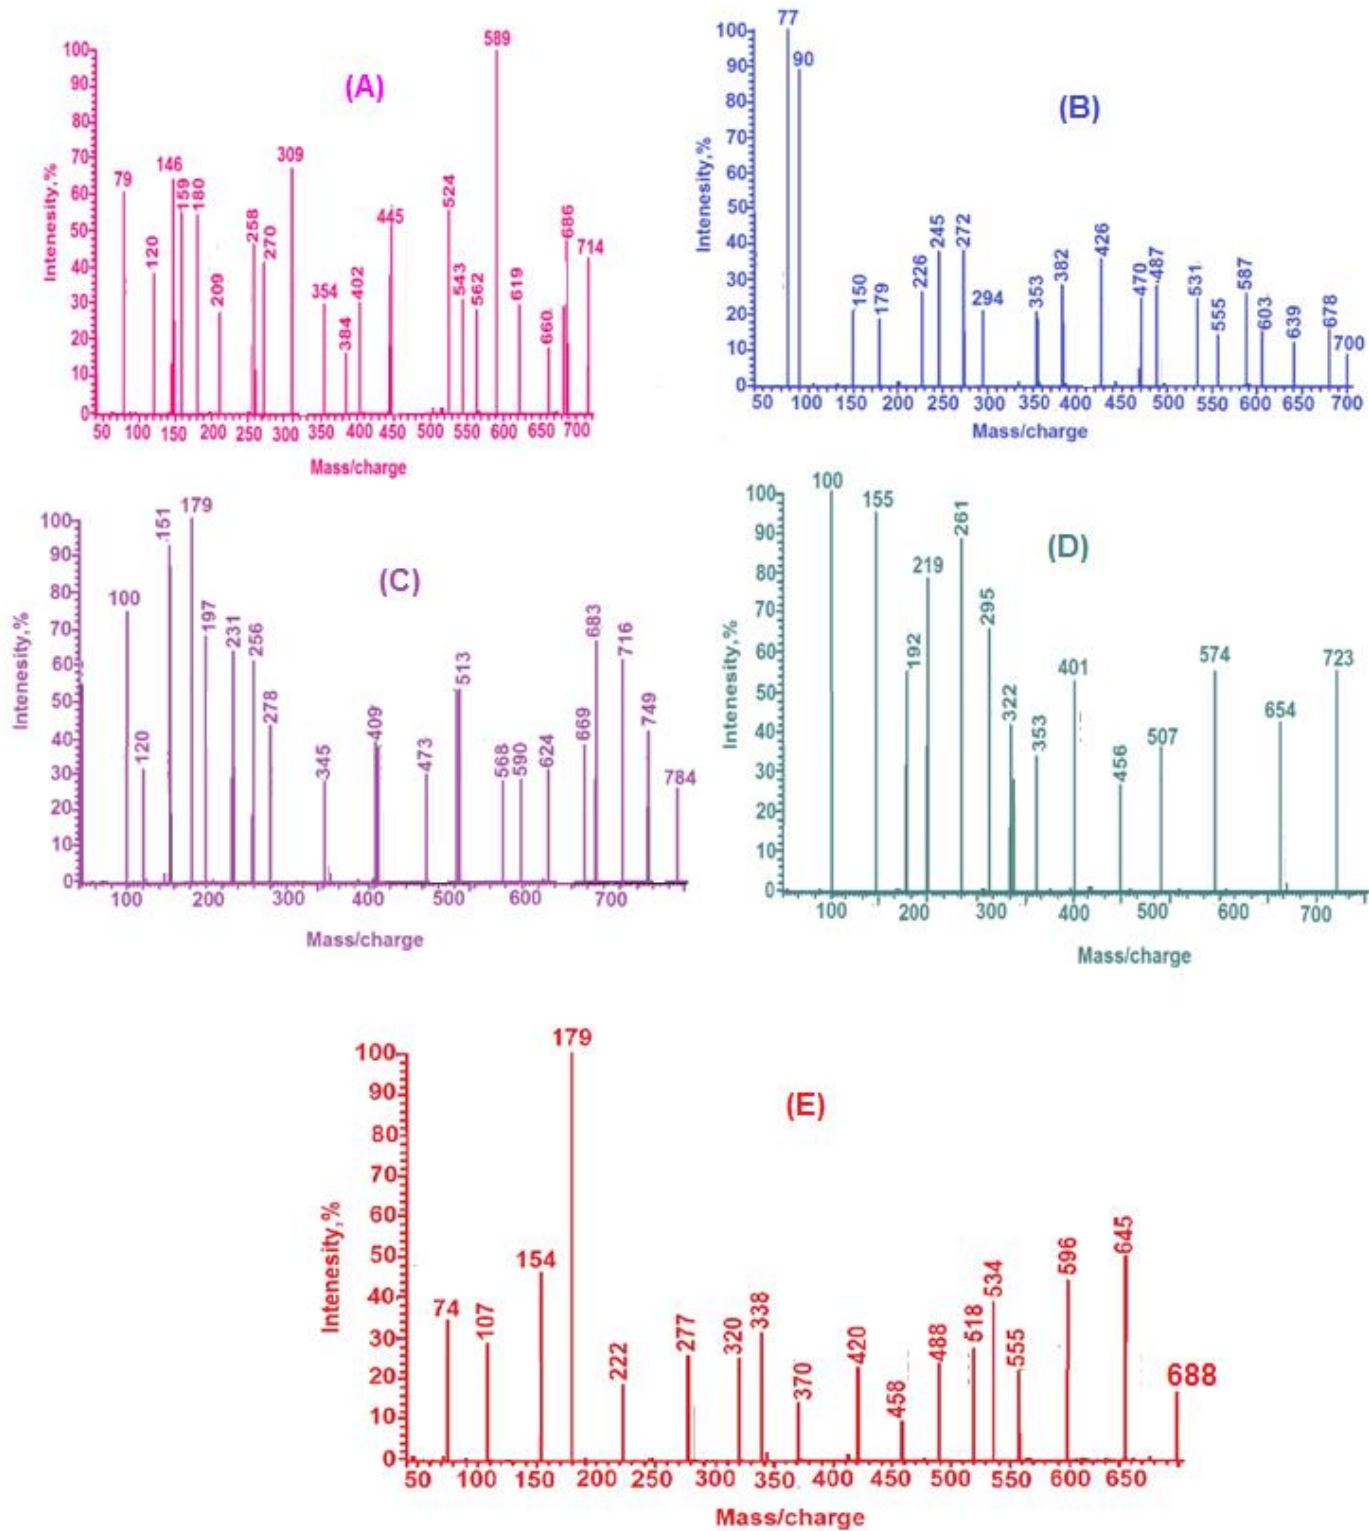

**Fig. S2:** Mass spectra diagrams for metal complexes

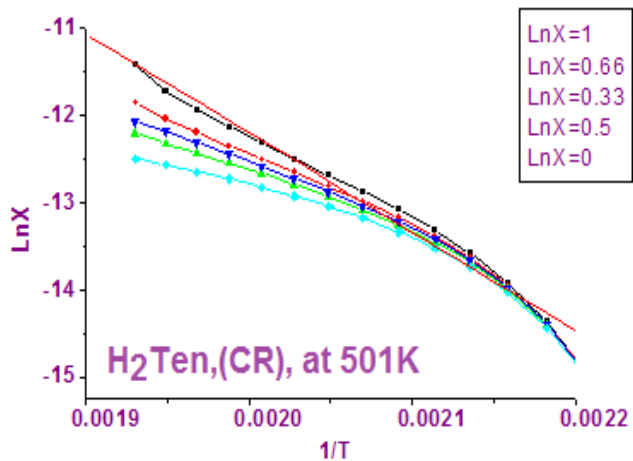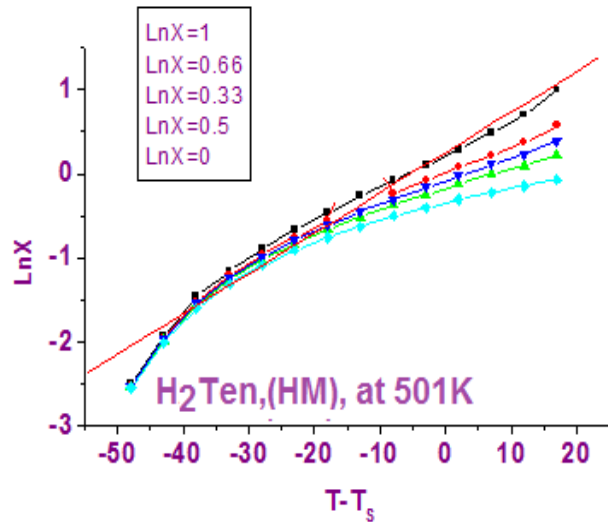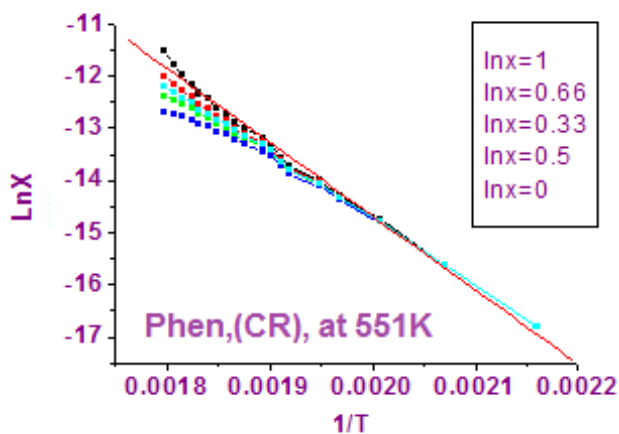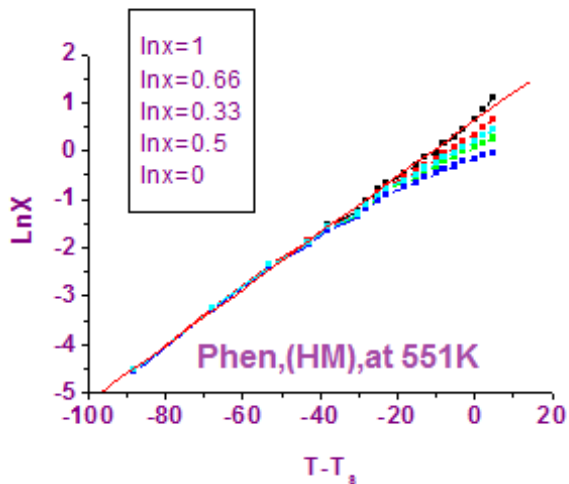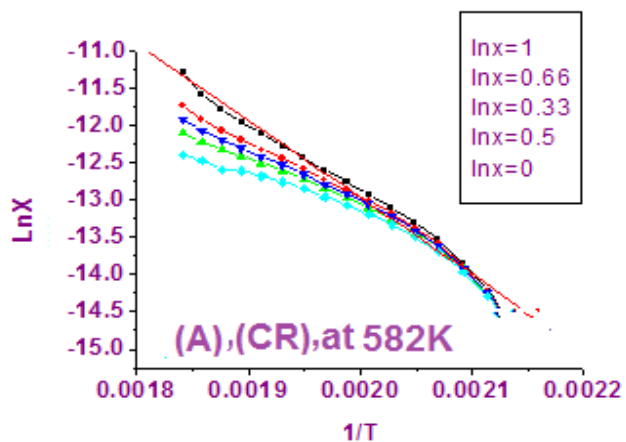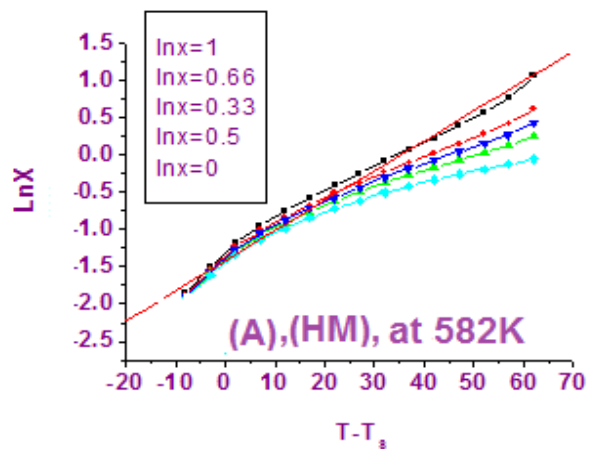

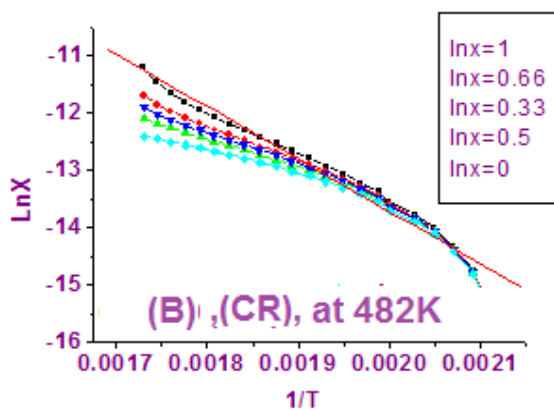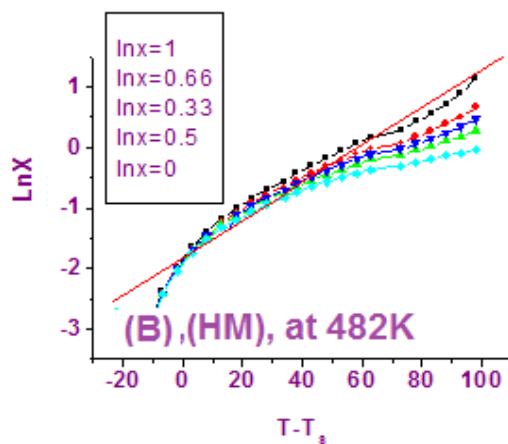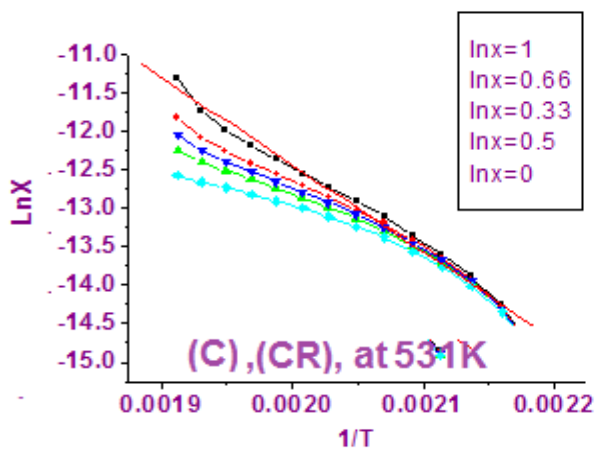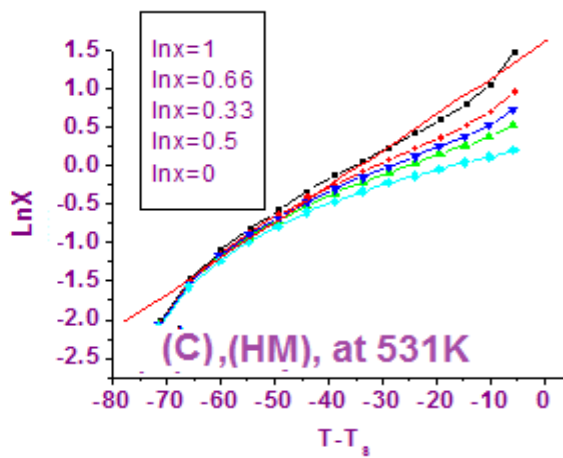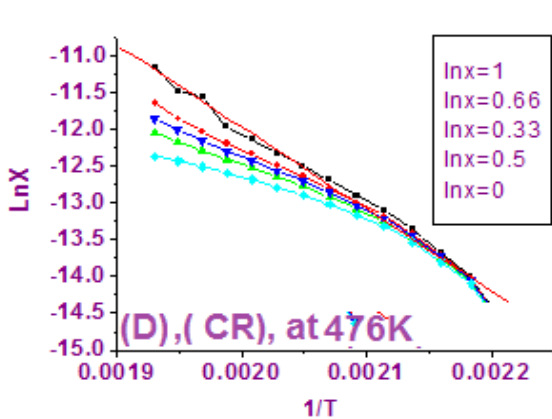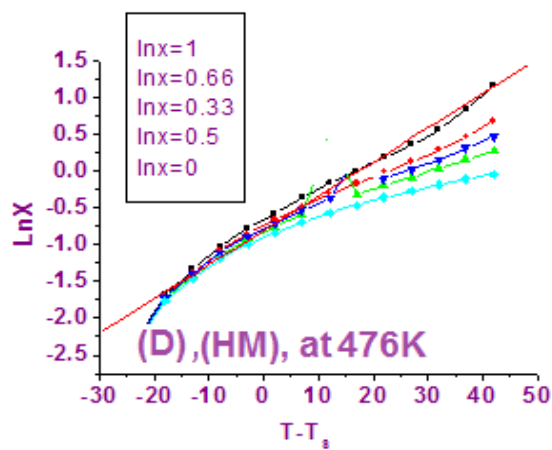

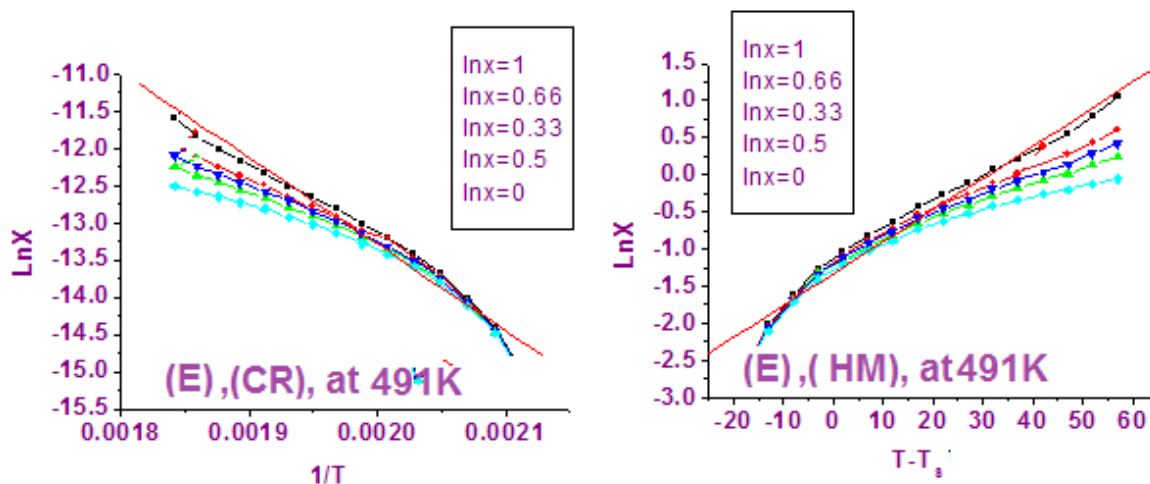

**Fig. S3:** The diagrams of kinetic parameters of  $H_2Ten$ ,  $Phen$  and their complexes using Coats-Redfern (CR) and Horowitz-Metzger (HM) equations.

**Table S1:** Elemental analysis and physico-analytical data for **H<sub>2</sub>Ten**, Phen and their complexes

| Compounds<br>M.Wt. (M.F.)                                                                                        | Yield% | Mp/°C | Color       | Found (Calcd.) (%) |                |                  |                |                  | $\mu_{\text{eff}}$ (B.M.) | $\Lambda$<br>S cm <sup>2</sup> mol <sup>-1</sup> |
|------------------------------------------------------------------------------------------------------------------|--------|-------|-------------|--------------------|----------------|------------------|----------------|------------------|---------------------------|--------------------------------------------------|
|                                                                                                                  |        |       |             | C                  | H              | N                | M              | Cl               |                           |                                                  |
| H <sub>2</sub> Ten<br>337.368(C <sub>13</sub> H <sub>11</sub> N <sub>3</sub> O <sub>4</sub> S <sub>2</sub> )     | -      | 211   | Yellow      | 46.20<br>(46.24)   | 3.23<br>(3.26) | 12.41<br>(12.44) | -              | -                | Diamagnetic               | 5.36                                             |
| Phen<br>198.2 (C <sub>12</sub> H <sub>10</sub> N <sub>2</sub> O)                                                 | -      | 100   | White       | 72.72<br>(72.70)   | 5.09<br>(5.08) | 14.13<br>(14.12) | -              | -                | Diamagnetic               | 5.20                                             |
| (A)<br>715.508(MnC <sub>25</sub> H <sub>27</sub> N <sub>5</sub> O <sub>8</sub> S <sub>2</sub> Cl <sub>2</sub> )  | 87.50  | 180   | Pale orange | 41.87<br>(41.92)   | 3.72<br>(3.77) | 9.71<br>(9.78)   | 7.62<br>(7.67) | 9.88<br>(9.92)   | 5.44                      | 172.20                                           |
| (B)<br>701.508(CoC <sub>25</sub> H <sub>25</sub> N <sub>5</sub> O <sub>7</sub> S <sub>2</sub> Cl <sub>2</sub> )  | 89.00  | 230   | Green       | 42.70<br>(42.76)   | 3.51<br>(3.56) | 9.92<br>(9.97)   | 8.35<br>(8.40) | 10.09<br>(10.12) | 5.10                      | 174.00                                           |
| (C)<br>784.268 (NiC <sub>29</sub> H <sub>35</sub> N <sub>5</sub> O <sub>13</sub> S <sub>2</sub> )                | 88.65  | 220   | Pale green  | 44.32<br>(44.37)   | 4.41<br>(4.46) | 8.88<br>(8.92)   | 7.42<br>(7.48) |                  | 3.30                      | 157.39                                           |
| (D)<br>724.118 (CuC <sub>25</sub> H <sub>27</sub> N <sub>5</sub> O <sub>8</sub> S <sub>2</sub> Cl <sub>2</sub> ) | 85.00  | 185   | Dark green  | 41.37<br>(41.42)   | 3.68<br>(4.72) | 9.61<br>(9.66)   | 8.72<br>(8.77) | 9.72<br>(9.80)   | 1.70                      | 171.42                                           |
| (E)<br>689.958(ZnC <sub>25</sub> H <sub>23</sub> N <sub>5</sub> O <sub>6</sub> S <sub>2</sub> Cl <sub>2</sub> )  | 84.20  | 220   | Pale yellow | 43.42<br>(43.48)   | 3.29<br>(3.33) | 10.09<br>(10.14) | 9.42<br>(9.47) | 10.21<br>(10.29) | Diamagnetic               | 176.30                                           |

**Table S2:**  $^1\text{H}$  NMR values (ppm) and tentative assignments for  $\text{H}_2\text{Ten}$ , Phen and their complexes

| $\text{H}_2\text{Ten}$ | Phen      | (A)       | (B)       | (C)       | (D)       | (E)       | Assignments                              |
|------------------------|-----------|-----------|-----------|-----------|-----------|-----------|------------------------------------------|
| 2.51                   | -         | 2.70      | 2.70      | 2.48      | 2.60      | 2.70      | $\delta\text{H}$ , $-\text{CH}_3$ methyl |
| -                      |           | 4.37-4.46 | 3.42-3.82 | 3.09-3.72 | 3.42-3.43 | 3.43-4.46 | $\delta\text{H}$ , $\text{H}_2\text{O}$  |
| 7.29-8.03              | 7.26-8.81 | 7.03-8.36 | 7.27-8.10 | 6.82-8.40 | 7.90-8.02 | 7.24-8.88 | $\delta\text{H}$ , $-\text{CH}$ aromatic |
| 8.34                   |           | 8.74      | 8.31      | 8.68      | 8.05      | 8.90      | $\delta\text{H}$ , $-\text{NH}$ amine    |
| 13.80                  |           | 13.77     | 13.62     | 13.60     | 13.56     | 13.58     | $\delta\text{H}$ , $\text{OH}$ enolate   |
